# Supplementary material for: A green approach for A3-coupling reactions: an experimental and theoretical study on NHC silver and gold catalysts
Source: Royal Society of Chemistry journal article supplement (doi:10.1039/d1nj03444h), 2021-01-01
Supplement: d1nj03444h1.pdf [file d1nj03444h1.pdf]

# A green approach for A<sup>3</sup>-coupling reactions: an experimental and theoretical study on NHC silver and gold catalysts

Authors: Chiara Costabile<sup>[a]</sup>, Annaluisa Mariconda<sup>\*[b]</sup>, Marco Sirignano<sup>[a]</sup>, Alessandra Crispini<sup>[c]</sup>,  
Francesca Scarpelli<sup>[c]</sup> and Pasquale Longo<sup>[a]</sup>

[a] Prof. P. Longo, Prof. C. Costabile, Dr. M. Sirignano  
*Dipartimento di Chimica e Biologia "A. Zambelli"*  
*Università di Salerno*  
*Via Giovanni Paolo II, 132*  
*84081 Fisciano (SA) Italy*

[b] Dr. A. Mariconda  
*Dipartimento di Scienze*  
*Università della Basilicata*  
*Viale Dell'Ateneo Lucano, 10*  
*85100 Potenza, Italy*  
E-mail: [annaluisa.mariconda@unibas.it](mailto:annaluisa.mariconda@unibas.it)

[c] Prof. A. Crispini, Dr. F. Scarpelli  
*MAT-InLAB, LASCAMM CR-INSTM, Unità INSTM della Calabria,*  
*Dipartimento di Chimica e Tecnologie Chimiche*  
*Università della Calabria,*  
*87036 Arcavacata di Rende (CS), Italy*

## List of contents

|                                        |    |
|----------------------------------------|----|
| A: <sup>1</sup> H-NMR of 3a .....      | 1  |
| B: <sup>13</sup> C-NMR of 3a .....     | 2  |
| C: ESI-MS of 3a .....                  | 2  |
| D: <sup>1</sup> H-NMR of 4a .....      | 3  |
| F: ESI-MS of 4a .....                  | 4  |
| G: <sup>1</sup> H-NMR of 3b .....      | 5  |
| H: <sup>13</sup> C-NMR of 3b .....     | 6  |
| I: MALDI-MS of 3b .....                | 7  |
| J: <sup>1</sup> H-NMR of 4b .....      | 8  |
| L: MALDI-MS of 4b .....                | 10 |
| M: Single Crystal X-Ray Analysis ..... | 11 |
| N: Computational details .....         | 15 |

**A:  $^1\text{H-NMR}$  of 3a**

$^1\text{H NMR}$  ( $\text{CD}_2\text{Cl}_2$ , 400 MHz): ppm  $\delta$  7.33-7.00 (m, 5H, aromatic protons), 6.89 (s, 1H,  $\text{CH}_{\text{imidazole}}$ ) 6.79 (s, 1H,  $\text{CH}_{\text{imidazole}}$ ), 5.13 (t, 1H,  $\text{CHO}^-$ ), 4.40 (d, 2H,  $\text{NCH}_2$ ), 3.82 (s, 3H,  $\text{NCH}_3$ ).

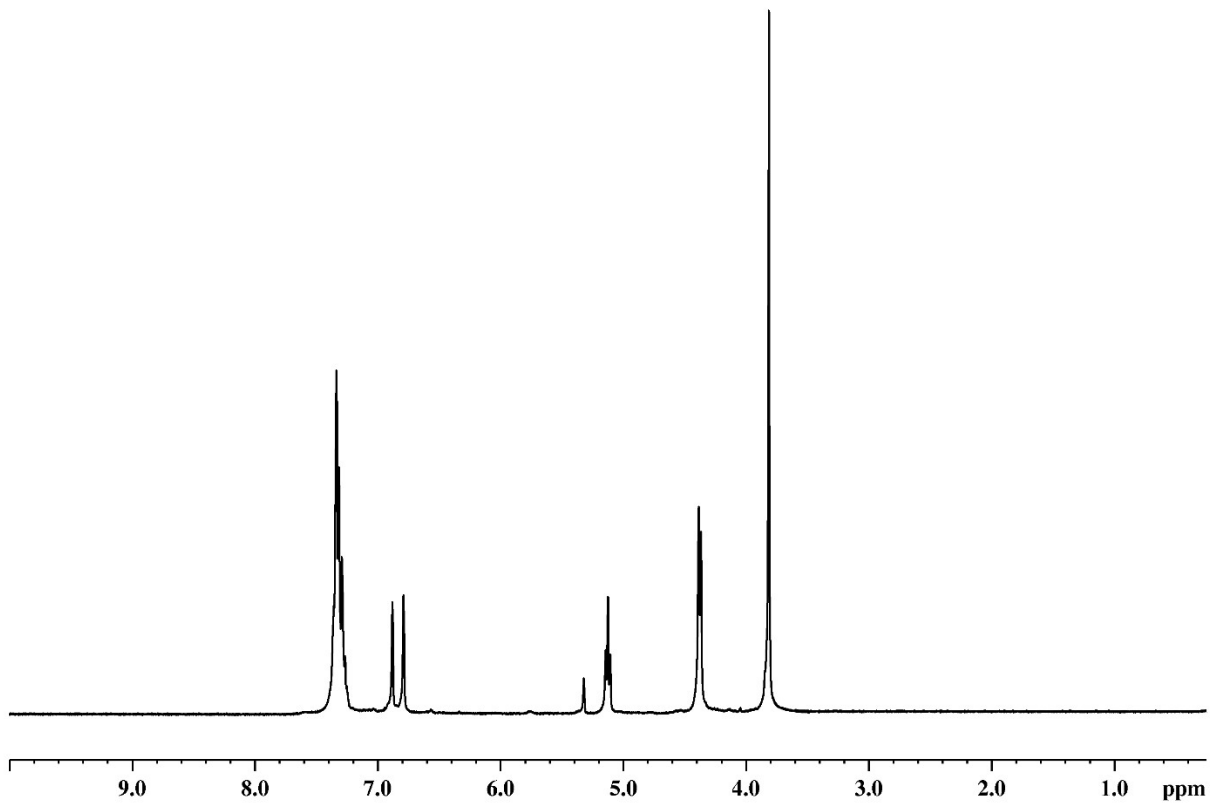

**B:  $^{13}\text{C}$ -NMR of 3a**

$^{13}\text{C}$   $\{^1\text{H}\}$  NMR ( $\text{CD}_2\text{Cl}_2$ , 100 MHz): ppm  $\delta$  184.6 (NCN), 141.8 ( $\text{C}_{\text{Ar}}$ ), 129.1 ( $\text{C}_{\text{Ar}}$ ), 128.4 ( $\text{C}_{\text{Ar}}$ ), 126.7 ( $\text{C}_{\text{Ar}}$ ), 122.8 (NCH), 121.8 (NCH), 73.9 ( $\text{CHO}^-$ ), 59.4 ( $\text{NCH}_2$ ), 39.2 ( $\text{NCH}_3$ ).

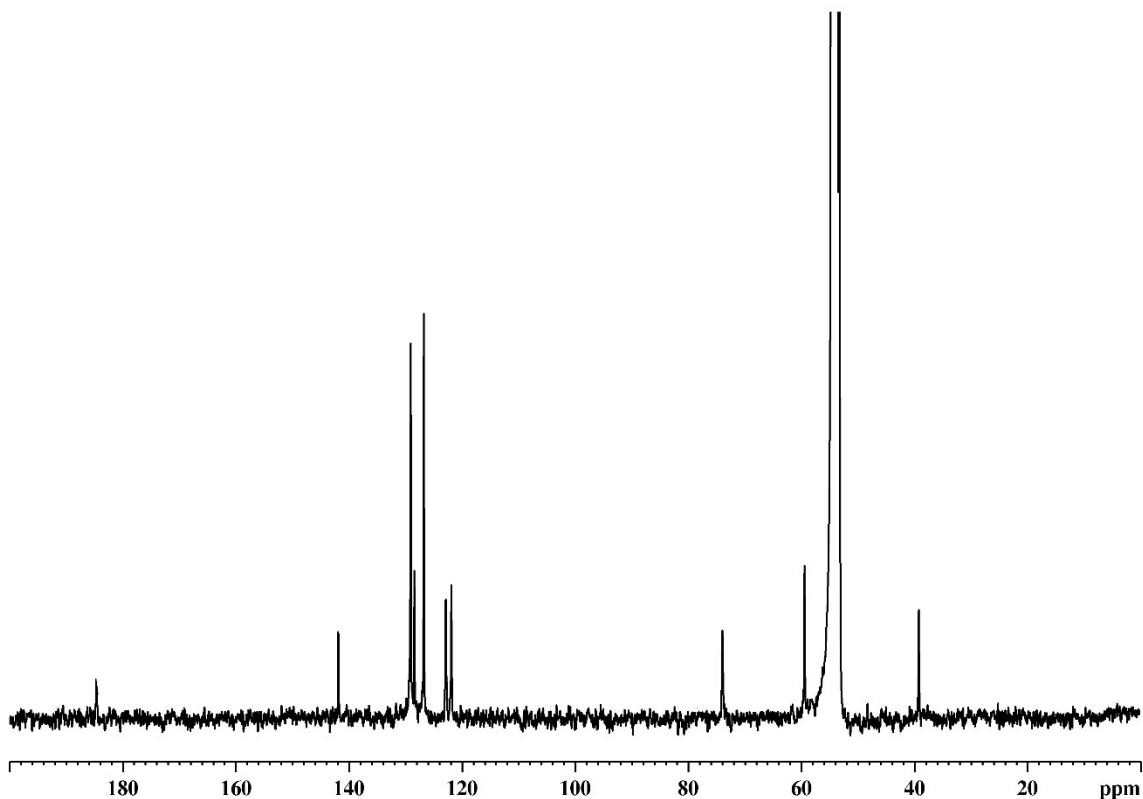

**C: ESI-MS of 3a**

(ESI):  $m/z$ : 528.1 Da attributable to  $[\text{C}_{22}\text{H}_{22}\text{AgN}_4\text{O}_2\text{Na}_2]^+$

MA1\_APRILE17 5 (0.842)

Scan ES+  
1.69e5

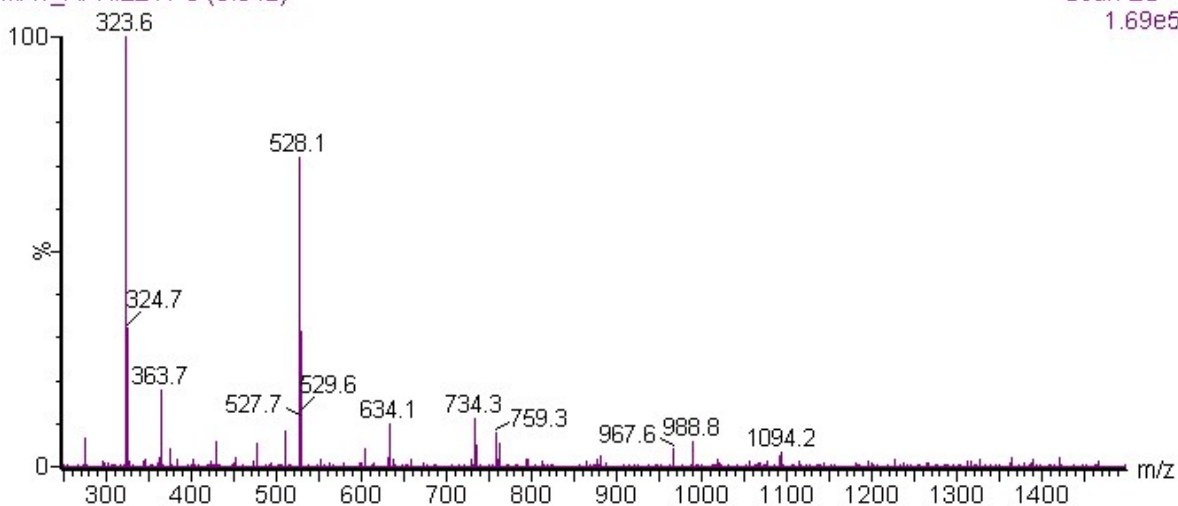

**D:<sup>1</sup>H-NMR of 4a**

<sup>1</sup>H NMR (CD<sub>2</sub>Cl<sub>2</sub>, 400 MHz): ppm δ 7.40-7.35 (m, 5H, aromatic protons), 7.04 (s, 1H, CH<sub>imidazole</sub>) 6.92 (s, 1H, CH<sub>imidazole</sub>), 5.23 (t, 1H, CHO<sup>-</sup>), 4.10 (d, 2H, NCH<sub>2</sub>), 3.81 (s, 3H, NCH<sub>3</sub>).

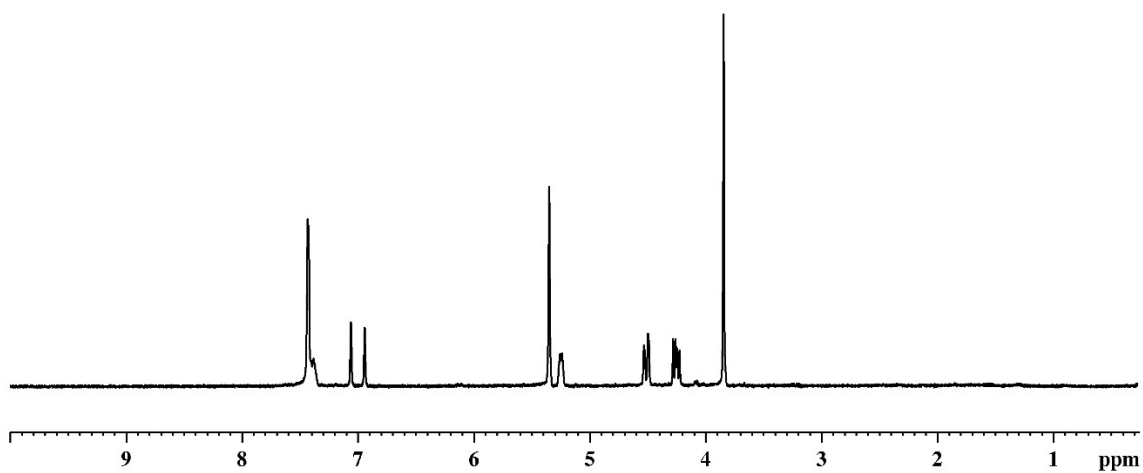

**E:  $^{13}\text{C}$ -NMR of 4a**

$^{13}\text{C}$   $\{^1\text{H}\}$  NMR ( $\text{CD}_2\text{Cl}_2$ , 100 MHz): ppm  $\delta$  171.8 (NCN), 141.8 ( $\text{C}_{\text{Ar}}$ ), 129.5 ( $\text{C}_{\text{Ar}}$ ), 129.3 ( $\text{C}_{\text{Ar}}$ ), 129.1 ( $\text{C}_{\text{Ar}}$ ), 122.9 (NCH), 121.8 (NCH), 74.5 ( $\text{CHO}^-$ ), 58.7 ( $\text{NCH}_2$ ), 38.8 ( $\text{NCH}_3$ ).

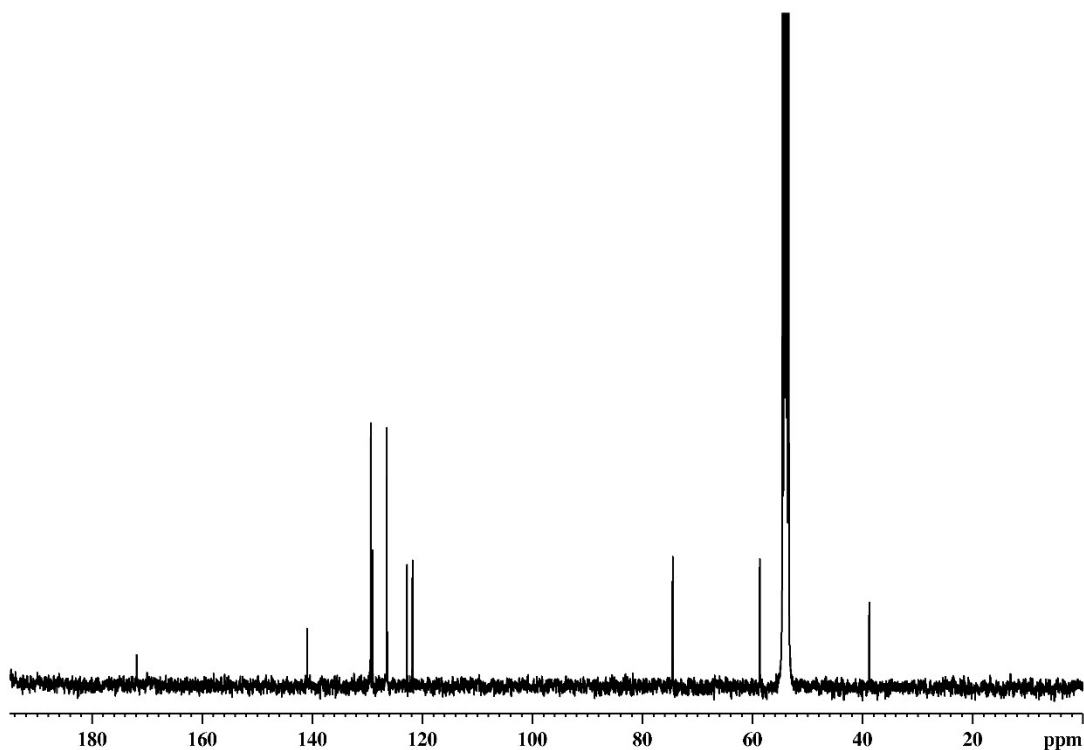

**F: ESI-MS of 4a**

**(ESI):**  $m/z$ : 612.3 Da attributable to  $[\text{C}_{22}\text{H}_{18}\text{AuN}_4\text{O}_2\text{Na}_2]^+$ .

AUMA1\_31MAGGIO18 2 (0.337)

Scan ES+  
6.03e5

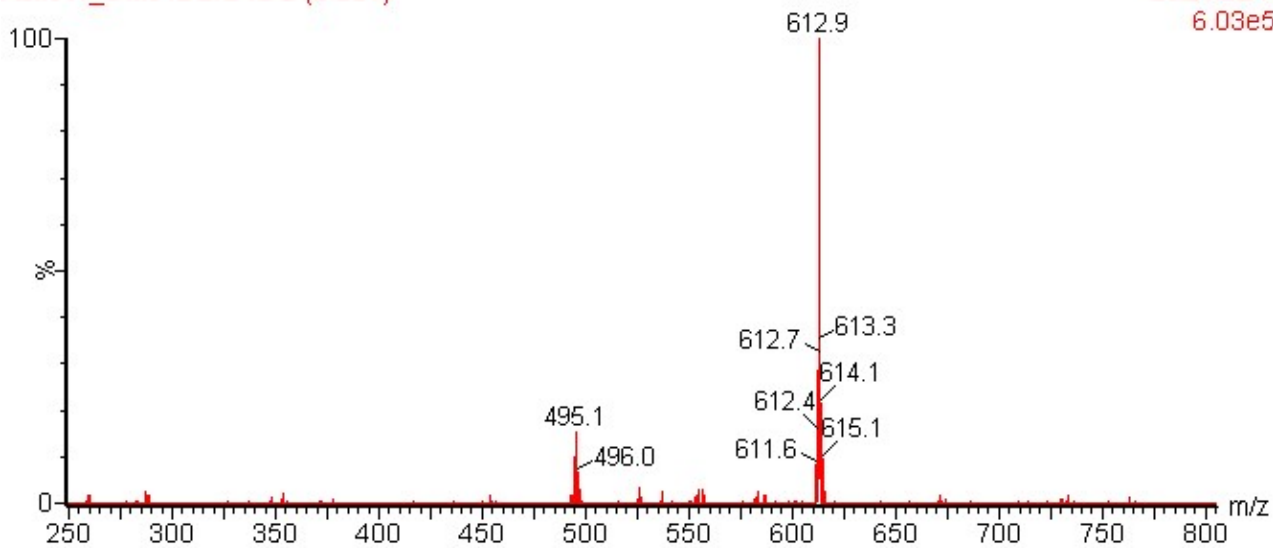

**G:<sup>1</sup>H-NMR of 3b**

<sup>1</sup>H NMR (400 MHz, DMSO-d<sub>6</sub>) ppm  $\delta$  7.34-7.26 (m, 7H, *aromatic protons*), 4.60 (m, 1H, CH<sub>2</sub>CHOCH<sub>3</sub>), 4.28 (m, 2H, NCH<sub>2</sub>CHOCH<sub>3</sub>), 3.74 (s, 3H, CH<sub>3</sub>N), 3.07 (s, 3H, CHOCH<sub>3</sub>).

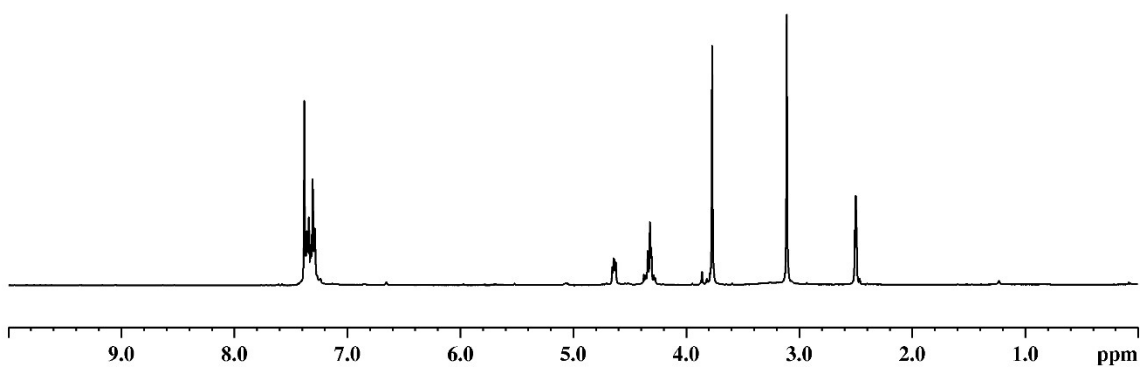

**H:<sup>13</sup>C-NMR of 3b**

<sup>13</sup>C NMR (100 MHz, DMSO-d<sub>6</sub>) ppm  $\delta$  181.6 (NCN), 138.2 (*ipso carbon aromatic ring*), 128.5, 128.2, 126.8 (*aromatic carbons*), 122.6, 122.3 (NCHCHN), 82.2 (CHOCH<sub>3</sub>), 56.4 (NCH<sub>2</sub>), 56.2 (OCH<sub>3</sub>), 38.1 (NCH<sub>3</sub>).

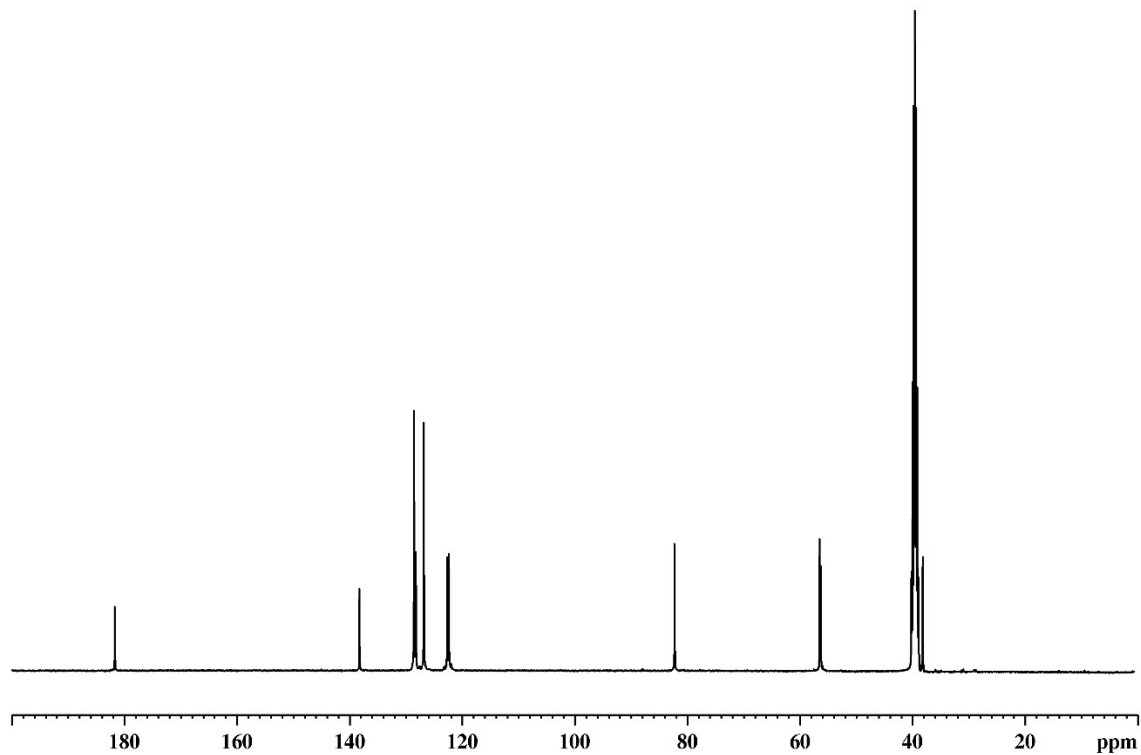

**I: MALDI-MS of 3b**

(MALDI, CH<sub>2</sub>Cl<sub>2</sub>): m/z = 539.1 Dalton attributable to [(C<sub>26</sub>H<sub>32</sub>N<sub>4</sub>O<sub>2</sub>)Ag]<sup>+</sup>.

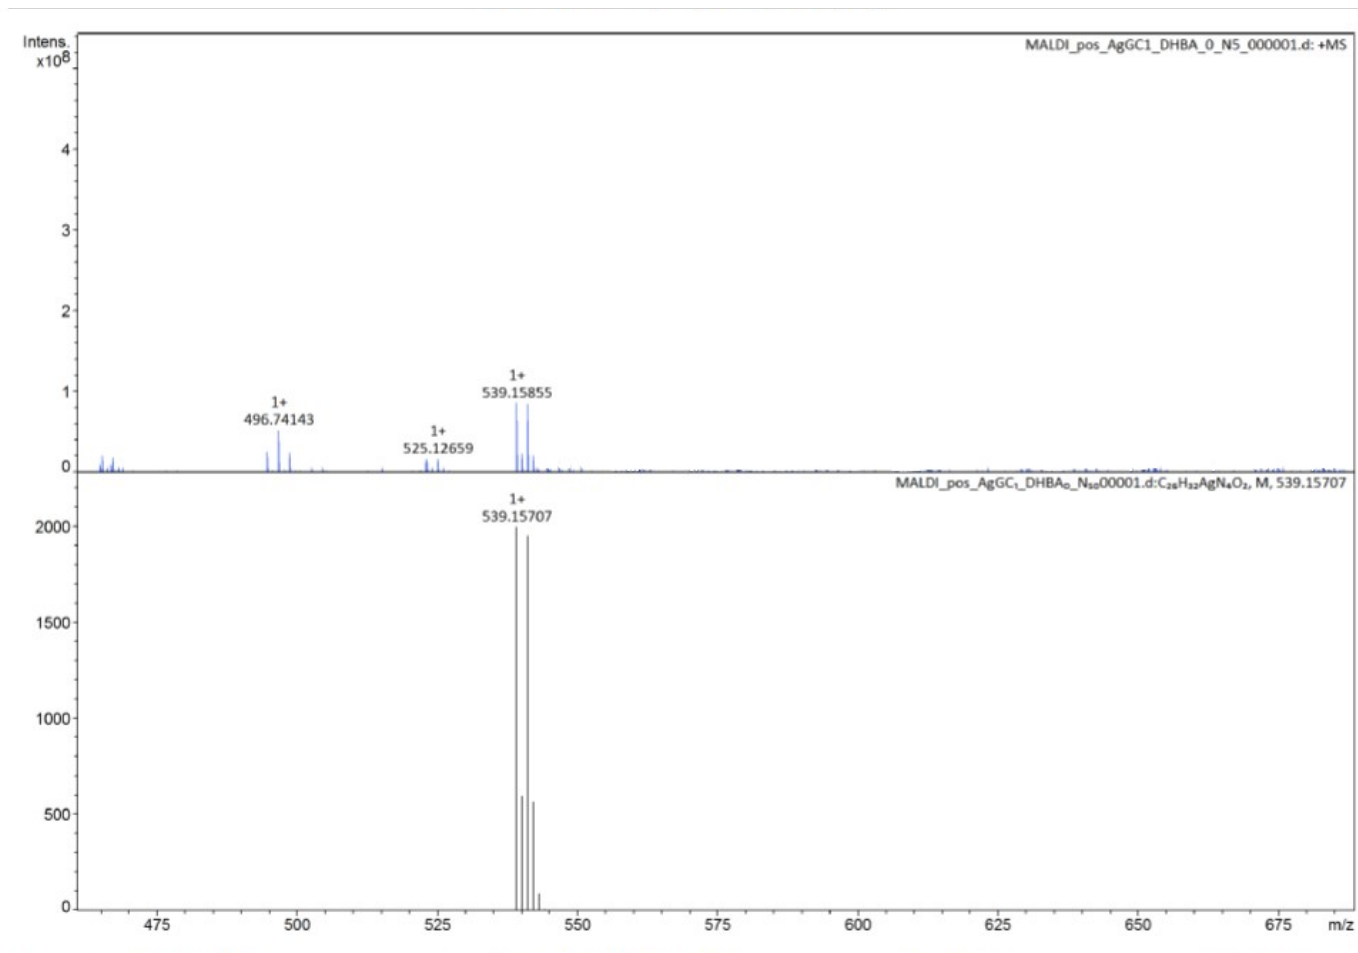



**J:<sup>1</sup>H-NMR of 4b**

<sup>1</sup>H NMR (400 MHz, DMSO-d<sub>6</sub>) ppm  $\delta$  7.35-7.29 (m, 7H, *aromatic protons*), 4.69 (m, 1H, *CHOCH<sub>3</sub>*), 4.26 (dd, 2H, *NCH<sub>2</sub>CHOCH<sub>3</sub>*), 3.70 (s, 3H, *NCH<sub>3</sub>*), 3.07 (s, 3H, *CHOCH<sub>3</sub>*).

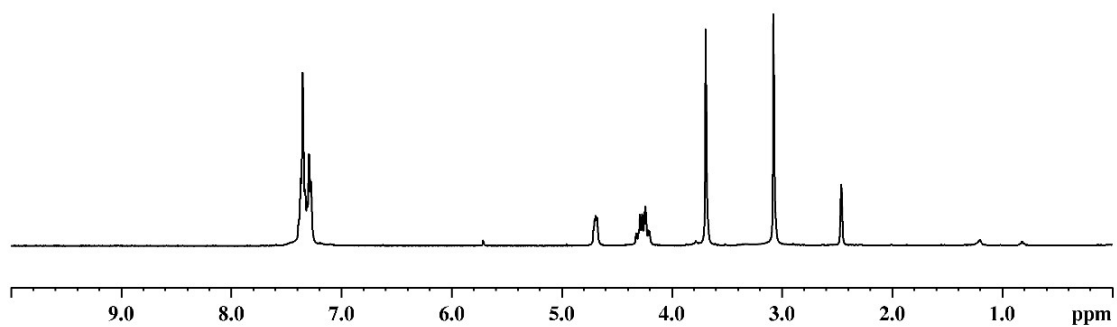

**K:<sup>13</sup>C-NMR of 4b**

<sup>13</sup>C NMR (100 MHz, DMSO-d<sub>6</sub>) ppm δ 169.1 (NCN), 137.9 (*ipso carbon aromatic ring*), 128.6, 128.3, 126.6 (*aromatic carbons*), 122.3, 122.2 (NCHCHN), 82.2 (CHOCH<sub>3</sub>), 56.4 (NCH<sub>2</sub>), 55.8 (OCH<sub>3</sub>), 37.6 (NCH<sub>3</sub>)

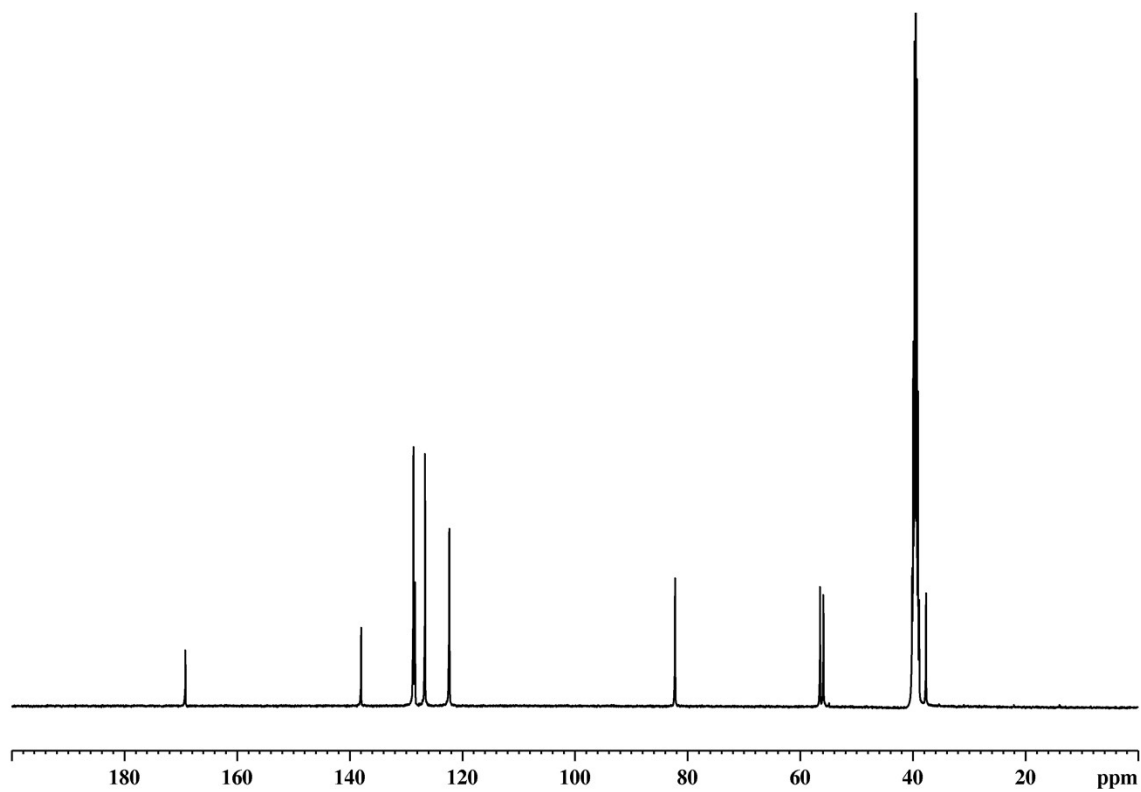

**L: MALDI-MS of 4b**

(MALDI, CH<sub>2</sub>Cl<sub>2</sub>): m/z = 629.22 attributable to [(C<sub>26</sub>H<sub>32</sub>N<sub>4</sub>O<sub>2</sub>)Au]<sup>+</sup>.

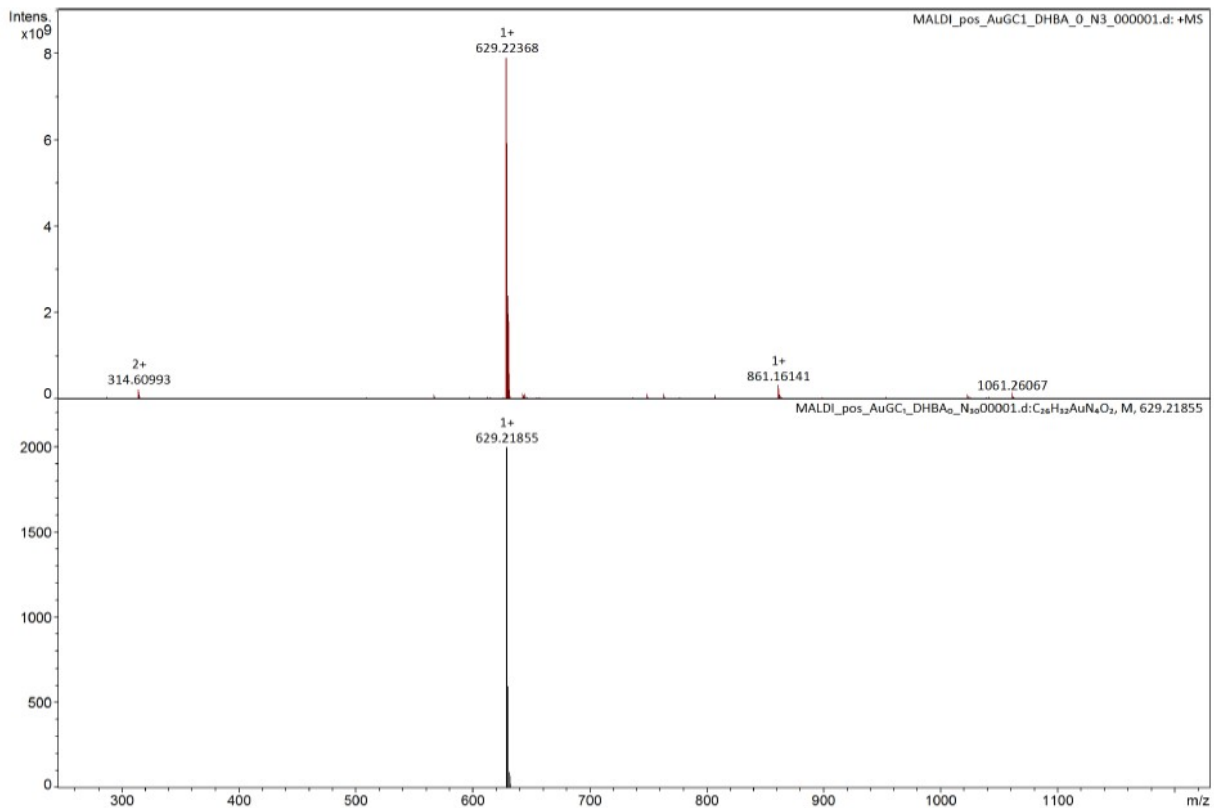

## M: Single Crystal X-Ray Analysis check CIF/PLATON report

Structure factors have been supplied for datablock(s) **4b**

THIS REPORT IS FOR GUIDANCE ONLY. IF USED AS PART OF A REVIEW PROCEDURE FOR PUBLICATION, IT SHOULD NOT REPLACE THE EXPERTISE OF AN EXPERIENCED CRYSTALLOGRAPHIC REFEREE.

No syntax errors found.    CIF dictionary    Interpreting this report

### Datablock: 4b

---

Bond precision:    C-C = 0.0043 A                      Wavelength=0.71073

Cell:                      a=9.012(3)              b=10.387(4)              c=16.294(5)  
                                    alpha=90              beta=105.724(13)              gamma=90

Temperature:              296 K

|                | Calculated         | Reported           |
|----------------|--------------------|--------------------|
| Volume         | 1468.2(9)          | 1468.2(9)          |
| Space group    | P 21/n             | P 21/n             |
| Hall group     | -P 2yn             | -P 2yn             |
| Moiety formula | C13 H16 Au Cl N2 O | ?                  |
| Sum formula    | C13 H16 Au Cl N2 O | C13 H16 Au Cl N2 O |
| Mr             | 448.70             | 448.69             |
| Dx, g cm-3     | 2.030              | 2.030              |
| Z              | 4                  | 4                  |
| Mu (mm-1)      | 10.192             | 10.192             |
| F000           | 848.0              | 848.0              |
| F000'          | 841.31             |                    |
| h, k, lmax     | 11, 13, 20         | 11, 13, 20         |
| Nref           | 3198               | 3192               |
| Tmin, Tmax     | 0.100, 0.361       | 0.125, 0.532       |
| Tmin'          | 0.012              |                    |

Correction method= # Reported T Limits: Tmin=0.125 Tmax=0.532  
AbsCorr = MULTI-SCAN

Data completeness= 0.998                      Theta(max)= 26.956

R(reflections)= 0.0166( 2857)              wR2(reflections)= 0.0391( 3192)

S = 1.058                      Npar= 165

---

The following ALERTS were generated. Each ALERT has the format

**test-name\_ALERT\_alert-type\_alert-level.**

Click on the hyperlinks for more details of the test.

---

### ● Alert level C

PLAT480\_ALERT\_4\_C Long H...A H-Bond Reported H5B ..CL . 2.95 Ang.  
PLAT480\_ALERT\_4\_C Long H...A H-Bond Reported H4B ..CL . 2.99 Ang.  
PLAT480\_ALERT\_4\_C Long H...A H-Bond Reported H4C ..CL . 2.97 Ang.

---

### ● Alert level G

PLAT793\_ALERT\_4\_G Model has Chirality at C6 (Centro SPGR) R Verify  
PLAT883\_ALERT\_1\_G No Info/Value for \_atom\_sites\_solution\_primary . Please Do !  
PLAT912\_ALERT\_4\_G Missing # of FCF Reflections Above STh/L= 0.600 6 Note  
PLAT965\_ALERT\_2\_G The SHELXL WEIGHT Optimisation has not Converged Please Check  
PLAT978\_ALERT\_2\_G Number C-C Bonds with Positive Residual Density. 3 Info

---

0 **ALERT level A** = Most likely a serious problem - resolve or explain  
0 **ALERT level B** = A potentially serious problem, consider carefully  
3 **ALERT level C** = Check. Ensure it is not caused by an omission or oversight  
5 **ALERT level G** = General information/check it is not something unexpected

1 ALERT type 1 CIF construction/syntax error, inconsistent or missing data  
2 ALERT type 2 Indicator that the structure model may be wrong or deficient  
0 ALERT type 3 Indicator that the structure quality may be low  
5 ALERT type 4 Improvement, methodology, query or suggestion  
0 ALERT type 5 Informative message, check

---

## Validation response form

Please find below a validation response form (VRF) that can be filled in and pasted into your CIF.

```
# start Validation Reply Form
_vrf_PLAT480_4b
;
PROBLEM: Long H...A H-Bond Reported H5B ..CL . 2.95 Ang.
RESPONSE: ...
;
# end Validation Reply Form
```

---

It is advisable to attempt to resolve as many as possible of the alerts in all categories. Often the minor alerts point to easily fixed oversights, errors and omissions in your CIF or refinement strategy, so attention to these fine details can be worthwhile. In order to resolve some of the more serious problems it may be necessary to carry out additional measurements or structure refinements. However, the purpose of your study may justify the reported deviations and the more serious of these should normally be commented upon in the discussion or experimental section of a paper or in the "special\_details" fields of the CIF. checkCIF was carefully designed to identify outliers and unusual parameters, but every test has its limitations and alerts that are not important in a particular case may appear. Conversely, the absence of alerts does not guarantee there are no aspects of the results needing attention. It is up to the individual to critically assess their own results and, if necessary, seek expert advice.

### Publication of your CIF in IUCr journals

A basic structural check has been run on your CIF. These basic checks will be run on all CIFs submitted for publication in IUCr journals (*Acta Crystallographica*, *Journal of Applied Crystallography*, *Journal of Synchrotron Radiation*); however, if you intend to submit to *Acta Crystallographica Section C* or *E* or *IUCrData*, you should make sure that full publication checks are run on the final version of your CIF prior to submission.

### Publication of your CIF in other journals

Please refer to the *Notes for Authors* of the relevant journal for any special instructions relating to CIF submission.

---

PLATON version of 16/05/2021; check.def file version of 13/05/2021

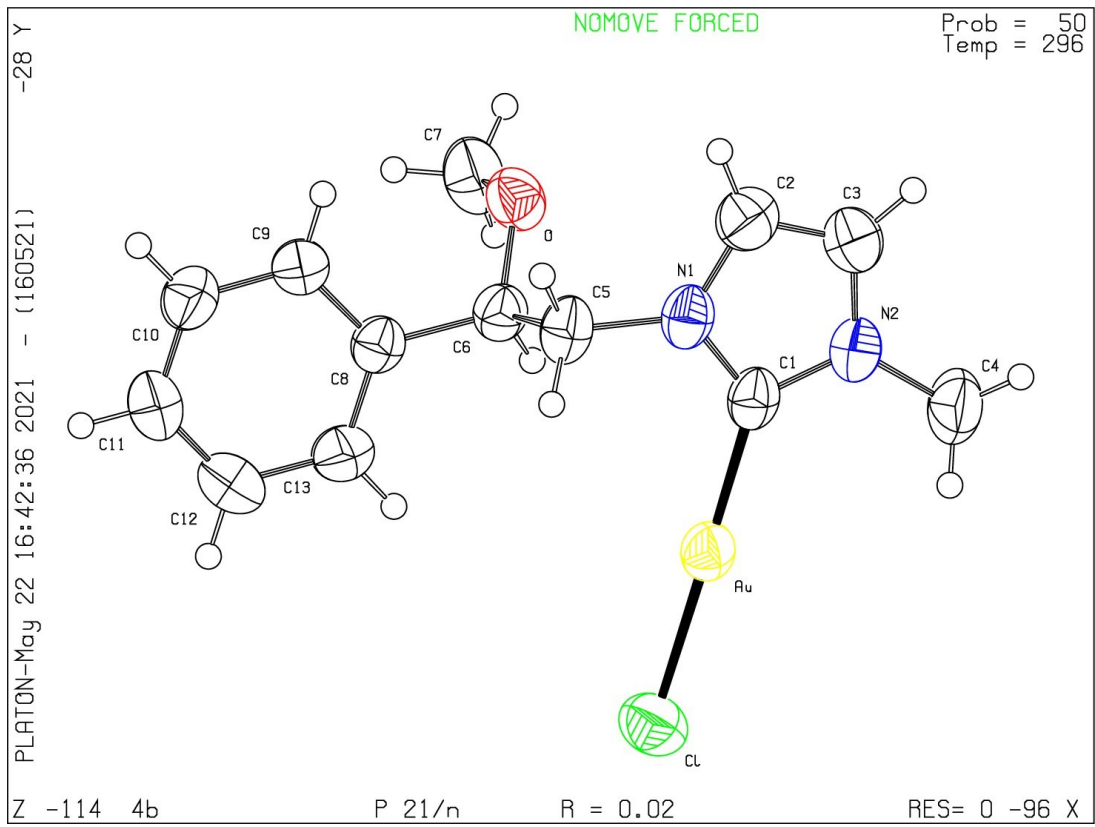

## N: Computational details

### Computational details relative to calculations on Ag and Au complexes and BDE of NHC and halogen ligands.

The DFT calculations were performed with the Gaussian09 set of programs,<sup>1</sup> using the PBE0 model.<sup>2</sup> The electronic configuration of the molecular systems was described with 6-311G(d,p) basis set for H, C, N, and O.<sup>3</sup> For Au we used the small-core, quasi-relativistic Stuttgart/Dresden effective core potential, with an associated (8s7p6d)/[6s5p3d] valence basis set contracted according to a (311111/22111/411) scheme (standard SDD keywords in gaussian09).<sup>4</sup> The geometry optimizations were performed without symmetry constraints and the characterization of the located stationary points was performed by analytical frequency calculations. Solvent effects including contributions of non electrostatic terms have been estimated in single-point calculations on the gas phase optimized structures, based on the polarizable continuous solvation model PCM using benzaldehyde as a solvent.<sup>5</sup>

---

<sup>1</sup> Gaussian 09, Revision A.02, Frisch, M. J.; Trucks, G. W.; Schlegel, H. B.; Scuseria, G. E.; Robb, M. A.; Cheeseman, J. R.; Scalmani, G.; Barone, V.; Mennucci, B.; Petersson, G. A.; Nakatsuji, H.; Caricato, M.; Li, X.; Hratchian, H. P.; Izmaylov, A. F.; Bloino, J.; Zheng, G.; Sonnenberg, J. L.; Hada, M.; Ehara, M.; Toyota, K.; Fukuda, R.; Hasegawa, J.; Ishida, M.; Nakajima, T.; Honda, Y.; Kitao, O.; Nakai, H.; Vreven, T.; Montgomery, J. A., Jr.; Peralta, J. E.; Ogliaro, F.; Bearpark, M.; Heyd, J. J.; Brothers, E.; N. Kudin, K.; Staroverov, V. N.; Kobayashi, R.; Normand, J.; Raghavachari, K.; Rendell, A.; Burant, J. C.; Iyengar, S. S.; Tomasi, J.; Cossi, M.; Rega, N.; Millam, J. M.; Klene, M.; Knox, J. E.; Cross, J. B.; Bakken, V.; Adamo, C.; Jaramillo, J.; Gomperts, R.; Stratmann, R. E.; Yazyev, O.; Austin, A. J.; Cammi, R.; Pomelli, C.; Ochterski, J. W.; Martin, R. L.; Morokuma, K.; Zakrzewski, V. G.; Voth, G. A.; Salvador, P.; Dannenberg, J. J.; Dapprich, S.; Daniels, A. D.; Farkas, O.; Foresman, J. B.; Ortiz, J. V.; Cioslowski, J.; Fox, D. J. Gaussian, Inc., Wallingford CT, **2009**.

<sup>2</sup> C. Adamo and V. Barone, "Toward reliable density functional methods without adjustable parameters: The PBE0 model," *J. Chem. Phys.*, **110** (1999) 6158-69.

<sup>3</sup> (a) A. D. McLean and G. S. Chandler, "Contracted Gaussian-basis sets for molecular calculations. 1. 2nd row atoms, Z=11-18," *J. Chem. Phys.*, **72** (1980) 5639-48. (b) K. Raghavachari, J. S. Binkley, R. Seeger, and J. A. Pople, "Self-Consistent Molecular Orbital Methods. 20. Basis set for correlated wave-functions," *J. Chem. Phys.*, **72** (1980) 650-54.

<sup>4</sup> a) Haeusermann, U., Dolg, M., Stoll, H. and Preuss, H. *Mol. Phys.* **1993**, *78*, 1211– 1224. b) Kuechle, W., Dolg, M., Stoll, H. and Preuss, H. *J. Chem. Phys.* **1994**, *100*, 7535– 7542. c) Leininger, T., Nicklass, A., Stoll, H., Dolg, M. and Schwerdtfeger, P. *J. Chem. Phys.* **1996**, *105*, 1052– 1059.

<sup>5</sup> a) Barone, V. and Cossi, M. *J. Phys. Chem. A* **1998**, *102*, 1995– 2001. b) Tomasi, J. and Persico, M. *Chem. Rev.* **1994**, *94*, 2027– 2094.



### Cartesian coordinates of calculated structures.

34

**2a-A** E(gas)=-862.649211575 G(gas)=-862.426149 E(Benzaldehyde)=-862.712289539

|    |           |           |           |
|----|-----------|-----------|-----------|
| Au | 1.611725  | -0.791844 | -0.066594 |
| C  | 1.269567  | 1.199907  | -0.179614 |
| N  | 0.084701  | 1.791521  | -0.438482 |
| N  | 2.137985  | 2.207622  | 0.037988  |
| C  | 0.208901  | 3.158324  | -0.374259 |
| C  | 1.504112  | 3.421179  | -0.078044 |
| C  | 3.550337  | 2.058773  | 0.347476  |
| H  | 4.151008  | 2.565366  | -0.409292 |
| H  | 3.761629  | 2.482083  | 1.330560  |
| H  | 3.795747  | 0.998245  | 0.351616  |
| C  | -1.174456 | 1.095436  | -0.673364 |
| C  | -1.945812 | 0.814318  | 0.613706  |
| H  | -1.779966 | 1.707695  | -1.342981 |
| H  | -0.955360 | 0.152802  | -1.179148 |
| C  | -3.304144 | 0.240125  | 0.287358  |
| O  | -1.136102 | -0.060562 | 1.375120  |
| H  | -2.082541 | 1.766565  | 1.148044  |
| H  | 2.021448  | 4.358201  | 0.047349  |
| H  | -0.619189 | 3.823953  | -0.555074 |
| C  | -3.450967 | -1.118431 | 0.009825  |
| C  | -4.697759 | -1.633329 | -0.321636 |
| C  | -5.805344 | -0.795525 | -0.382205 |
| C  | -5.665253 | 0.559023  | -0.104017 |
| C  | -4.419714 | 1.073407  | 0.232509  |
| H  | -2.588191 | -1.774236 | 0.068931  |
| H  | -4.806501 | -2.691944 | -0.531439 |
| H  | -6.778614 | -1.199205 | -0.638661 |
| H  | -6.529079 | 1.213801  | -0.138471 |
| H  | -4.318759 | 2.129994  | 0.466730  |
| H  | -1.617722 | -0.288676 | 2.175222  |
| C  | 2.269124  | -2.840971 | -0.552112 |
| C  | 1.737741  | -2.899495 | 0.550430  |
| H  | 2.766971  | -3.015147 | -1.484890 |
| H  | 1.324859  | -3.179741 | 1.498615  |

33

**4a-A** E(gas)=-862.214952378 G(gas)=-862.001205 E(Benzaldehyde)=-862.232842022

|    |           |           |           |
|----|-----------|-----------|-----------|
| Au | 1.282789  | -0.855256 | 0.011966  |
| C  | 1.284450  | 1.221716  | -0.136940 |
| N  | 0.189533  | 1.952142  | -0.426667 |
| N  | 2.263692  | 2.129804  | 0.075730  |
| C  | 0.476375  | 3.297485  | -0.400249 |
| C  | 1.787071  | 3.412636  | -0.083245 |
| C  | 3.627735  | 1.801826  | 0.430214  |
| H  | 4.317041  | 2.165829  | -0.335131 |
| H  | 3.884940  | 2.245893  | 1.394307  |
| H  | 3.699999  | 0.717758  | 0.501175  |
| C  | -1.133225 | 1.386812  | -0.691995 |
| C  | -1.534549 | 0.332007  | 0.361147  |
| H  | -1.833474 | 2.224497  | -0.709562 |
| H  | -1.130732 | 0.907135  | -1.675338 |
| C  | -3.035467 | 0.101354  | 0.224126  |
| O  | -0.844823 | -0.838081 | 0.224575  |
| H  | -1.372822 | 0.815542  | 1.349659  |
| H  | 2.408975  | 4.283204  | 0.043569  |
| H  | -0.267517 | 4.049336  | -0.605727 |

|   |           |           |           |
|---|-----------|-----------|-----------|
| C | -3.504722 | -1.084661 | -0.330781 |
| C | -4.870493 | -1.300902 | -0.478063 |
| C | -5.782892 | -0.336618 | -0.066815 |
| C | -5.321525 | 0.847157  | 0.499810  |
| C | -3.956661 | 1.060814  | 0.644426  |
| H | -2.771039 | -1.827618 | -0.621863 |
| H | -5.225349 | -2.231459 | -0.910785 |
| H | -6.848842 | -0.508706 | -0.177268 |
| H | -6.027140 | 1.599952  | 0.837725  |
| H | -3.603284 | 1.980356  | 1.106898  |
| C | 2.950515  | -2.084387 | -0.115183 |
| C | 1.935196  | -2.817710 | 0.075135  |
| H | 4.007226  | -1.969455 | -0.278728 |
| H | 1.476880  | -3.781176 | 0.206203  |

51

**2a-B** E(gas)=-1114.33564403 G(gas)=-1113.963249 E(Benzaldehyde)=-1114.39242258

|    |           |           |           |
|----|-----------|-----------|-----------|
| Au | -0.418759 | 0.387664  | -0.773679 |
| C  | 0.580455  | 1.827649  | 0.237388  |
| N  | 1.729868  | 1.677298  | 0.929018  |
| N  | 0.276095  | 3.138491  | 0.328342  |
| C  | 2.145022  | 2.884270  | 1.439728  |
| C  | 1.226707  | 3.805288  | 1.064397  |
| C  | -0.885371 | 3.779186  | -0.263710 |
| H  | -1.478925 | 4.263667  | 0.513105  |
| H  | -0.567621 | 4.519458  | -0.999743 |
| H  | -1.487277 | 3.017415  | -0.756288 |
| C  | 2.484369  | 0.437292  | 1.052989  |
| C  | 3.560911  | 0.291473  | -0.019587 |
| H  | 2.939363  | 0.410808  | 2.044419  |
| H  | 1.782289  | -0.395066 | 0.974707  |
| C  | 4.389191  | -0.943711 | 0.245979  |
| O  | 2.878560  | 0.251726  | -1.255347 |
| H  | 4.216676  | 1.174571  | 0.026513  |
| H  | 1.166588  | 4.862319  | 1.265133  |
| H  | 3.040561  | 2.985549  | 2.030592  |
| C  | 3.931038  | -2.198223 | -0.155037 |
| C  | 4.679222  | -3.336029 | 0.118275  |
| C  | 5.888213  | -3.230347 | 0.796436  |
| C  | 6.351073  | -1.982294 | 1.196148  |
| C  | 5.605101  | -0.843635 | 0.919152  |
| H  | 2.993289  | -2.277086 | -0.695831 |
| H  | 4.319799  | -4.308347 | -0.201200 |
| H  | 6.473116  | -4.119102 | 1.006472  |
| H  | 7.299408  | -1.894161 | 1.714919  |
| H  | 5.979486  | 0.131866  | 1.218648  |
| H  | 3.528205  | 0.108096  | -1.948916 |
| C  | -1.904201 | -1.151735 | -1.374424 |
| C  | -1.070567 | -1.089407 | -2.276452 |
| H  | -2.772085 | -1.376350 | -0.682134 |
| H  | -0.476913 | -1.203174 | -3.160473 |
| N  | -4.196984 | -1.734978 | 0.303569  |
| C  | -5.404564 | -1.633967 | -0.527010 |
| H  | -4.128592 | -2.684592 | 0.661711  |
| C  | -6.698325 | -1.789421 | 0.265058  |
| H  | -5.383840 | -0.648469 | -1.010565 |
| H  | -5.335920 | -2.380507 | -1.323635 |
| C  | -6.740909 | -0.805596 | 1.430662  |
| H  | -7.556082 | -1.644657 | -0.399193 |

|   |           |           |          |
|---|-----------|-----------|----------|
| H | -6.766322 | -2.816972 | 0.645892 |
| C | -5.488407 | -0.936007 | 2.292859 |
| H | -6.806166 | 0.218026  | 1.038175 |
| H | -7.639101 | -0.964733 | 2.033774 |
| C | -4.230650 | -0.807190 | 1.439695 |
| H | -5.477577 | -0.179307 | 3.083908 |
| H | -5.484336 | -1.913627 | 2.792489 |
| H | -4.168137 | 0.209832  | 1.029187 |
| H | -3.329108 | -0.965995 | 2.039969 |

51

**2a-BC<sup>‡</sup>** E(gas)=-1114.32802812 G(gas)=-1113.955483 E(Benzaldehyde)=-1114.38859782

|    |           |           |           |
|----|-----------|-----------|-----------|
| Au | -0.521440 | 0.731554  | -0.577573 |
| C  | 0.808471  | 1.950919  | 0.330281  |
| N  | 1.967537  | 1.598136  | 0.928631  |
| N  | 0.742088  | 3.293658  | 0.457896  |
| C  | 2.621746  | 2.708231  | 1.414667  |
| C  | 1.848685  | 3.777140  | 1.120008  |
| C  | -0.331201 | 4.130682  | -0.044008 |
| H  | -0.773745 | 4.702317  | 0.773781  |
| H  | 0.050417  | 4.814150  | -0.804762 |
| H  | -1.088707 | 3.486599  | -0.488110 |
| C  | 2.507796  | 0.249119  | 0.978741  |
| C  | 3.609978  | 0.019194  | -0.053202 |
| H  | 2.892127  | 0.059997  | 1.983285  |
| H  | 1.685876  | -0.442655 | 0.784610  |
| C  | 4.182436  | -1.370409 | 0.108609  |
| O  | 3.016525  | 0.238265  | -1.311864 |
| H  | 4.412402  | 0.752226  | 0.127000  |
| H  | 1.986370  | 4.825431  | 1.327703  |
| H  | 3.564820  | 2.644831  | 1.932057  |
| C  | 3.566598  | -2.460686 | -0.504460 |
| C  | 4.076980  | -3.741026 | -0.330157 |
| C  | 5.202158  | -3.943399 | 0.460660  |
| C  | 5.821065  | -2.859805 | 1.072870  |
| C  | 5.314092  | -1.578915 | 0.894345  |
| H  | 2.695675  | -2.296243 | -1.130831 |
| H  | 3.597438  | -4.583850 | -0.816678 |
| H  | 5.601982  | -4.942941 | 0.592581  |
| H  | 6.706597  | -3.011013 | 1.680678  |
| H  | 5.812304  | -0.732483 | 1.360167  |
| H  | 3.675887  | 0.061833  | -1.987956 |
| C  | -1.976433 | -0.560135 | -1.396585 |
| C  | -1.581590 | -0.536923 | -2.564983 |
| H  | -3.065672 | -1.155759 | -0.382265 |
| H  | -1.279264 | -0.551989 | -3.591609 |
| N  | -3.903059 | -1.579014 | 0.237727  |
| C  | -5.056870 | -1.865500 | -0.653908 |
| H  | -3.563166 | -2.452728 | 0.639845  |
| C  | -6.248189 | -2.378177 | 0.136552  |
| H  | -5.289940 | -0.925072 | -1.161911 |
| H  | -4.716685 | -2.575479 | -1.410458 |
| C  | -6.618883 | -1.413779 | 1.259799  |
| H  | -7.087370 | -2.522263 | -0.548989 |
| H  | -6.014278 | -3.366643 | 0.552642  |
| C  | -5.412328 | -1.128415 | 2.149723  |
| H  | -6.983711 | -0.473773 | 0.827607  |
| H  | -7.438630 | -1.823345 | 1.854764  |
| C  | -4.233879 | -0.630258 | 1.330968  |

|   |           |           |          |
|---|-----------|-----------|----------|
| H | -5.653619 | -0.379660 | 2.908863 |
| H | -5.122532 | -2.038089 | 2.691469 |
| H | -4.460777 | 0.325167  | 0.848659 |
| H | -3.332016 | -0.494057 | 1.931719 |

51

**2a-C** E(gas)=-1114.34999001 G(gas)=-1113.973965 E(Benzaldehyde)=-1114.41661568

|    |           |           |           |
|----|-----------|-----------|-----------|
| Au | -0.555473 | 0.683104  | -0.733567 |
| C  | 0.639771  | 1.941917  | 0.339467  |
| N  | 1.771607  | 1.629051  | 1.008712  |
| N  | 0.505735  | 3.277617  | 0.489713  |
| C  | 2.340946  | 2.754383  | 1.560831  |
| C  | 1.540975  | 3.794827  | 1.235807  |
| C  | -0.565031 | 4.077621  | -0.074719 |
| H  | -1.099813 | 4.603178  | 0.718690  |
| H  | -0.158549 | 4.801263  | -0.783559 |
| H  | -1.250202 | 3.412193  | -0.598021 |
| C  | 2.375359  | 0.307180  | 1.049081  |
| C  | 3.511773  | 0.152072  | 0.039668  |
| H  | 2.743811  | 0.117089  | 2.059278  |
| H  | 1.593670  | -0.419562 | 0.819453  |
| C  | 4.136722  | -1.217174 | 0.177992  |
| O  | 2.937768  | 0.382907  | -1.224759 |
| H  | 4.277980  | 0.912372  | 0.260523  |
| H  | 1.616708  | 4.843183  | 1.473089  |
| H  | 3.250049  | 2.720949  | 2.138443  |
| C  | 3.590110  | -2.311035 | -0.491762 |
| C  | 4.149460  | -3.573814 | -0.339910 |
| C  | 5.253692  | -3.754988 | 0.484803  |
| C  | 5.803295  | -2.667444 | 1.153719  |
| C  | 5.247979  | -1.403845 | 0.997720  |
| H  | 2.735963  | -2.162295 | -1.144737 |
| H  | 3.725197  | -4.418996 | -0.871579 |
| H  | 5.692066  | -4.740515 | 0.598618  |
| H  | 6.672974  | -2.801495 | 1.787895  |
| H  | 5.692750  | -0.552910 | 1.507394  |
| H  | 3.611924  | 0.241755  | -1.894537 |
| C  | -1.688590 | -0.517027 | -1.853260 |
| C  | -2.341011 | -1.230371 | -2.598374 |
| H  | -3.022216 | -1.313594 | -0.662706 |
| H  | -2.857759 | -1.828321 | -3.316407 |
| N  | -3.608644 | -1.543533 | 0.190205  |
| C  | -4.732361 | -2.444694 | -0.197667 |
| H  | -2.990187 | -2.036267 | 0.836142  |
| C  | -5.601808 | -2.762273 | 1.005261  |
| H  | -5.295192 | -1.913590 | -0.970277 |
| H  | -4.294172 | -3.337173 | -0.648694 |
| C  | -6.098460 | -1.487006 | 1.680567  |
| H  | -6.438182 | -3.382467 | 0.673185  |
| H  | -5.030565 | -3.369343 | 1.719434  |
| C  | -4.929805 | -0.574855 | 2.042619  |
| H  | -6.779504 | -0.956683 | 1.003858  |
| H  | -6.675431 | -1.734726 | 2.574450  |
| C  | -4.069207 | -0.275768 | 0.829077  |
| H  | -5.285801 | 0.372014  | 2.456585  |
| H  | -4.315117 | -1.042322 | 2.822852  |
| H  | -4.628689 | 0.264145  | 0.060323  |
| H  | -3.175209 | 0.305477  | 1.064263  |

50

**4a-B** E(gas)=-1113.89417512 G(gas)=-1113.531252 E(Benzaldehyde)=-  
1113.90804885

|    |           |           |           |
|----|-----------|-----------|-----------|
| Au | 1.512771  | -0.897299 | -0.318114 |
| C  | 2.551705  | 0.846774  | 0.116329  |
| N  | 2.001866  | 2.077669  | 0.055674  |
| N  | 3.784620  | 1.042735  | 0.637015  |
| C  | 2.876834  | 3.029834  | 0.527094  |
| C  | 4.004428  | 2.378130  | 0.894828  |
| C  | 4.741401  | -0.011665 | 0.894425  |
| H  | 5.666409  | 0.173854  | 0.343809  |
| H  | 4.958619  | -0.075864 | 1.963013  |
| H  | 4.296048  | -0.947640 | 0.559470  |
| C  | 0.649466  | 2.358327  | -0.421283 |
| C  | -0.426991 | 1.493870  | 0.274175  |
| H  | 0.471049  | 3.421950  | -0.248565 |
| H  | 0.600674  | 2.163048  | -1.496775 |
| C  | -1.768145 | 2.147612  | -0.031938 |
| O  | -0.396565 | 0.190212  | -0.133707 |
| H  | -0.251324 | 1.610061  | 1.365643  |
| H  | 4.927928  | 2.745624  | 1.310597  |
| H  | 2.626545  | 4.077345  | 0.558242  |
| C  | -2.476822 | 1.779387  | -1.173629 |
| C  | -3.682866 | 2.395949  | -1.485531 |
| C  | -4.201390 | 3.382906  | -0.653941 |
| C  | -3.505643 | 3.749174  | 0.492536  |
| C  | -2.296793 | 3.134700  | 0.797882  |
| H  | -2.071138 | 0.987529  | -1.794417 |
| H  | -4.226048 | 2.099153  | -2.377599 |
| H  | -5.147631 | 3.857521  | -0.893018 |
| H  | -3.910455 | 4.508083  | 1.154991  |
| H  | -1.762016 | 3.414695  | 1.702632  |
| C  | 2.099595  | -2.877431 | -0.781115 |
| C  | 0.846336  | -2.834896 | -0.731224 |
| H  | 3.045901  | -3.360335 | -0.932218 |
| H  | -0.215936 | -3.075385 | -0.721247 |
| N  | -2.081835 | -2.268859 | -0.066357 |
| C  | -2.288290 | -2.680255 | 1.315692  |
| H  | -1.668276 | -1.329045 | -0.076743 |
| C  | -3.377983 | -1.889234 | 2.039326  |
| H  | -2.558570 | -3.746966 | 1.318632  |
| H  | -1.333413 | -2.592990 | 1.844790  |
| C  | -4.684363 | -1.941528 | 1.250730  |
| H  | -3.519944 | -2.281017 | 3.053780  |
| H  | -3.051540 | -0.846119 | 2.137710  |
| C  | -4.458042 | -1.486621 | -0.188892 |
| H  | -5.061928 | -2.974268 | 1.249166  |
| H  | -5.453198 | -1.328287 | 1.732911  |
| C  | -3.320862 | -2.282060 | -0.831514 |
| H  | -5.375778 | -1.599524 | -0.778831 |
| H  | -4.199070 | -0.420712 | -0.198067 |
| H  | -3.637045 | -3.329403 | -0.947895 |
| H  | -3.108315 | -1.905043 | -1.837340 |

50

**4a-BC<sup>‡</sup>** E(gas)=-1113.88736978 G(gas)=-1113.525878 E(Benzaldehyde)=-  
1113.90212604

|    |          |           |           |
|----|----------|-----------|-----------|
| Au | 1.608976 | -0.825748 | -0.452137 |
| C  | 2.473138 | 0.917442  | 0.154026  |
| N  | 1.832004 | 2.105434  | 0.207969  |
| N  | 3.650200 | 1.128139  | 0.789399  |

|   |           |           |           |
|---|-----------|-----------|-----------|
| C | 2.591638  | 3.041024  | 0.872817  |
| C | 3.741057  | 2.427358  | 1.238012  |
| C | 4.670813  | 0.120138  | 0.976748  |
| H | 5.630644  | 0.483060  | 0.602171  |
| H | 4.765036  | -0.138164 | 2.034136  |
| H | 4.367467  | -0.763871 | 0.416284  |
| C | 0.492939  | 2.344212  | -0.312751 |
| C | -0.603113 | 1.561710  | 0.457301  |
| H | 0.320606  | 3.422507  | -0.271744 |
| H | 0.465963  | 2.020945  | -1.356920 |
| C | -1.937307 | 2.125294  | -0.026455 |
| O | -0.487897 | 0.223785  | 0.273035  |
| H | -0.497516 | 1.867744  | 1.523339  |
| H | 4.604950  | 2.801776  | 1.761688  |
| H | 2.257547  | 4.054892  | 1.018251  |
| C | -2.523422 | 1.613207  | -1.183120 |
| C | -3.722806 | 2.127705  | -1.659582 |
| C | -4.361458 | 3.159390  | -0.978603 |
| C | -3.789623 | 3.672217  | 0.179758  |
| C | -2.585038 | 3.158063  | 0.648380  |
| H | -2.023934 | 0.794024  | -1.690847 |
| H | -4.165661 | 1.720487  | -2.563694 |
| H | -5.302706 | 3.556488  | -1.345038 |
| H | -4.286950 | 4.469188  | 0.724245  |
| H | -2.146411 | 3.554314  | 1.561472  |
| C | 1.735182  | -2.835578 | -1.347667 |
| C | 0.576211  | -2.686210 | -0.915302 |
| H | 2.607630  | -3.249420 | -1.808675 |
| H | -0.643298 | -2.515118 | -0.425641 |
| N | -1.775706 | -2.097105 | 0.171393  |
| C | -1.922846 | -2.707645 | 1.491917  |
| H | -1.501900 | -1.085540 | 0.276614  |
| C | -3.138566 | -2.174403 | 2.240455  |
| H | -2.012316 | -3.794993 | 1.360568  |
| H | -1.000884 | -2.519008 | 2.048982  |
| C | -4.402261 | -2.339525 | 1.399745  |
| H | -3.239374 | -2.691251 | 3.201065  |
| H | -2.978495 | -1.111847 | 2.460315  |
| C | -4.221334 | -1.702693 | 0.024382  |
| H | -4.618358 | -3.410305 | 1.279111  |
| H | -5.264552 | -1.902143 | 1.913016  |
| C | -2.969826 | -2.243333 | -0.658855 |
| H | -5.096641 | -1.888738 | -0.607585 |
| H | -4.126492 | -0.615192 | 0.128685  |
| H | -3.099781 | -3.310568 | -0.886089 |
| H | -2.786219 | -1.730993 | -1.607773 |

50

**4a-C** E(gas)=-1113.93967151 G(gas)=-1113.574277 E(Benzaldehyde)=-1113.95965933

|    |          |           |           |
|----|----------|-----------|-----------|
| Au | 1.942812 | -0.663424 | -0.573554 |
| C  | 2.176577 | 1.197938  | 0.217984  |
| N  | 1.292961 | 2.218001  | 0.136862  |
| N  | 3.187386 | 1.677937  | 0.976698  |
| C  | 1.737266 | 3.311787  | 0.844291  |
| C  | 2.935904 | 2.973630  | 1.371756  |
| C  | 4.373529 | 0.926699  | 1.332708  |
| H  | 5.268349 | 1.443155  | 0.978708  |
| H  | 4.428107 | 0.797269  | 2.415726  |
| H  | 4.308326 | -0.051082 | 0.856828  |

|   |           |           |           |
|---|-----------|-----------|-----------|
| C | 0.009158  | 2.133098  | -0.536009 |
| C | -1.147242 | 1.878936  | 0.445322  |
| H | -0.159860 | 3.062519  | -1.087736 |
| H | 0.093062  | 1.317366  | -1.255889 |
| C | -2.472771 | 1.851661  | -0.290679 |
| O | -0.922614 | 0.755730  | 1.242118  |
| H | -1.175578 | 2.731957  | 1.136755  |
| H | 3.623796  | 3.538391  | 1.978903  |
| H | 1.176167  | 4.229634  | 0.905022  |
| C | -2.657842 | 1.084643  | -1.442249 |
| C | -3.894116 | 1.041542  | -2.074816 |
| C | -4.966977 | 1.762231  | -1.563333 |
| C | -4.795693 | 2.527047  | -0.416021 |
| C | -3.556720 | 2.570147  | 0.211399  |
| H | -1.836622 | 0.501801  | -1.847937 |
| H | -4.019877 | 0.440207  | -2.969353 |
| H | -5.932600 | 1.726798  | -2.056748 |
| H | -5.628153 | 3.091313  | -0.008277 |
| H | -3.427576 | 3.163420  | 1.112270  |
| C | 1.328578  | -3.586341 | -1.729923 |
| C | 1.603164  | -2.478865 | -1.306144 |
| H | 1.116371  | -4.558080 | -2.111843 |
| H | -0.552669 | -2.127597 | -0.178331 |
| N | -1.340723 | -1.862595 | 0.410971  |
| C | -1.150923 | -2.452035 | 1.737717  |
| H | -1.120733 | -0.096062 | 0.767312  |
| C | -2.290813 | -2.041388 | 2.659972  |
| H | -1.104755 | -3.553421 | 1.676325  |
| H | -0.190367 | -2.105864 | 2.129477  |
| C | -3.637661 | -2.445114 | 2.064466  |
| H | -2.150185 | -2.499707 | 3.644655  |
| H | -2.254506 | -0.954596 | 2.794925  |
| C | -3.777817 | -1.913335 | 0.640715  |
| H | -3.710726 | -3.541443 | 2.047498  |
| H | -4.459832 | -2.085473 | 2.692050  |
| C | -2.581927 | -2.327590 | -0.205015 |
| H | -4.700268 | -2.281173 | 0.178906  |
| H | -3.837521 | -0.818812 | 0.655936  |
| H | -2.578668 | -3.426627 | -0.316561 |
| H | -2.654342 | -1.900750 | -1.209337 |
